# Supplementary material
Source: publisher site journal article supplement (https://www.spandidos-publications.com/5204/downloadSupplementary)

Figure S1. Kaplan-Meier curves of relapse-free survival and overall survival. (A) Relapse-free survival of group A and group B; (B) overall survival of group A and group B.

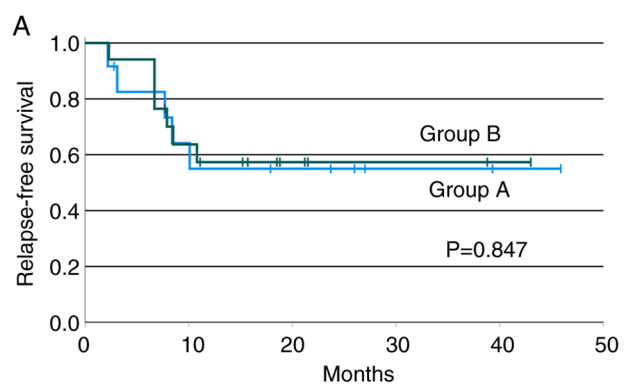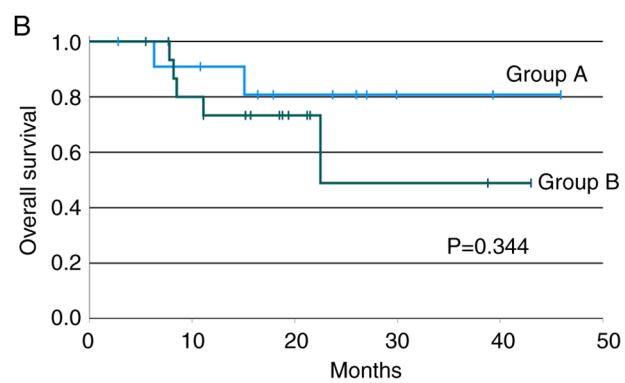

Supplement: Supplementary file 1 [file downloadSupplementary]
